# Supplementary material for: Network Characteristic Analysis of ADR-related Proteins and Identification of ADR-ADR Associations
Source: PubMed Central journal article supplement — Sci Rep. 2013 Apr 29;3:1744. doi: 10.1038/srep01744 (PMC3638162; doi:10.1038/srep01744), 2013-04-29

# **Network Characteristic Analysis of ADR-related Proteins and Identification of ADR-ADR Associations**

Xiujie Chen\*†, Xiangqiong Liu†, Xiaodong Jia†, Fujian Tan†, Ruizhi Yang†, Sheng  
Chen, Lei Liu, Yunfeng Wang, Yuelong Chen

College of Bioinformatics Science and Technology, Harbin Medical University, Harbin,  
Heilongjiang 150081, PR China

## **Supplementary Material List**

### **1. Tables**

**Table S1. The differences between ADR-Protein network and random network**

**Table S2. One-to-one relationships between ADRs and ADRPs**

**Table S3. The enrichment results of modules in GO biological processes, cellular components  
and molecular functions**

**Table S4. The degree of ADRs**

**Table S5. The degree of ADRPs**

### **2. Figures**

**Figure S1. A global view of all ADR-Protein Network modules**

**Figure S2. Degree distribution of all the nodes in ADR-Protein network**

**Figure S3. Degree distribution of all ADRPs in ADR-Protein network**

**Figure S4. Degree distribution of all ADRs in ADR-Protein network**

**Figure S5. Composition map of 41 modules**

**Figure S6. The result of nonparametric multiple comparison test for tissue distributions**

**Figure S7. Tissue distributions of ADRPs, RDRPs and DRPs by randomly select equal  
numbers (A: 50, B: 100, C: 200, D: 285)**

**Figure S8. The distribution of ADRPs and DRPs in each tissue**

**Figure S9. The distribution of ADRPs and DRPs in different interval of tissue number**

## Tables

**Table S1 .the differences between ADR-Protein network and random network**

| <i>Metric</i>          | <i>ADR-Protein network</i> | <i>Random Networks average</i> | <i>Random Networks Standard Deviation</i> |
|------------------------|----------------------------|--------------------------------|-------------------------------------------|
| Clustering Coefficient | 0.078363                   | 0.014072                       | 5.15E-04                                  |
| Average Degree         | 8.899915                   | 16.43248                       | 0                                         |
| Degree Distribution    | -1.3709                    | -0.01581                       | 0.527722                                  |
| Mean Shortest Path     | 4.172485                   | 2.805762                       | 8.45E-04                                  |

**Table S2. One-to-one relationships between ADRs andADRPs**

| <i>ADR</i>                                       | <i>ADRP(Gene Symbol)</i> |
|--------------------------------------------------|--------------------------|
| hemolytic anemia                                 | HK1                      |
| toxicological effects of l-alanosine             | ADSS                     |
| kidney diseases                                  | ABCC2                    |
| increased lipid peroxidation                     | CRAT                     |
| pulmonary fibrosis                               | COL1A1                   |
| neuronal toxicity                                | HSD11K                   |
| bullae                                           | TYMP                     |
| bone marrow damage                               | CYP2E1                   |
| homocystinuria                                   | CBS                      |
| methemoglobinemia                                | NPR1                     |
| inefficiency of drug absorption across intestine | CHRM4                    |
| lung damage                                      | CYP2F1                   |
| hypercholesterolemia-induced retardation         | NT5E                     |

**Table S3, S4 and S5. [Appear in a separate tab -delimited excel file named Table S3-S5.](#)**

# Figures

Figure S1. A global view of all ADR-Protein Network modules

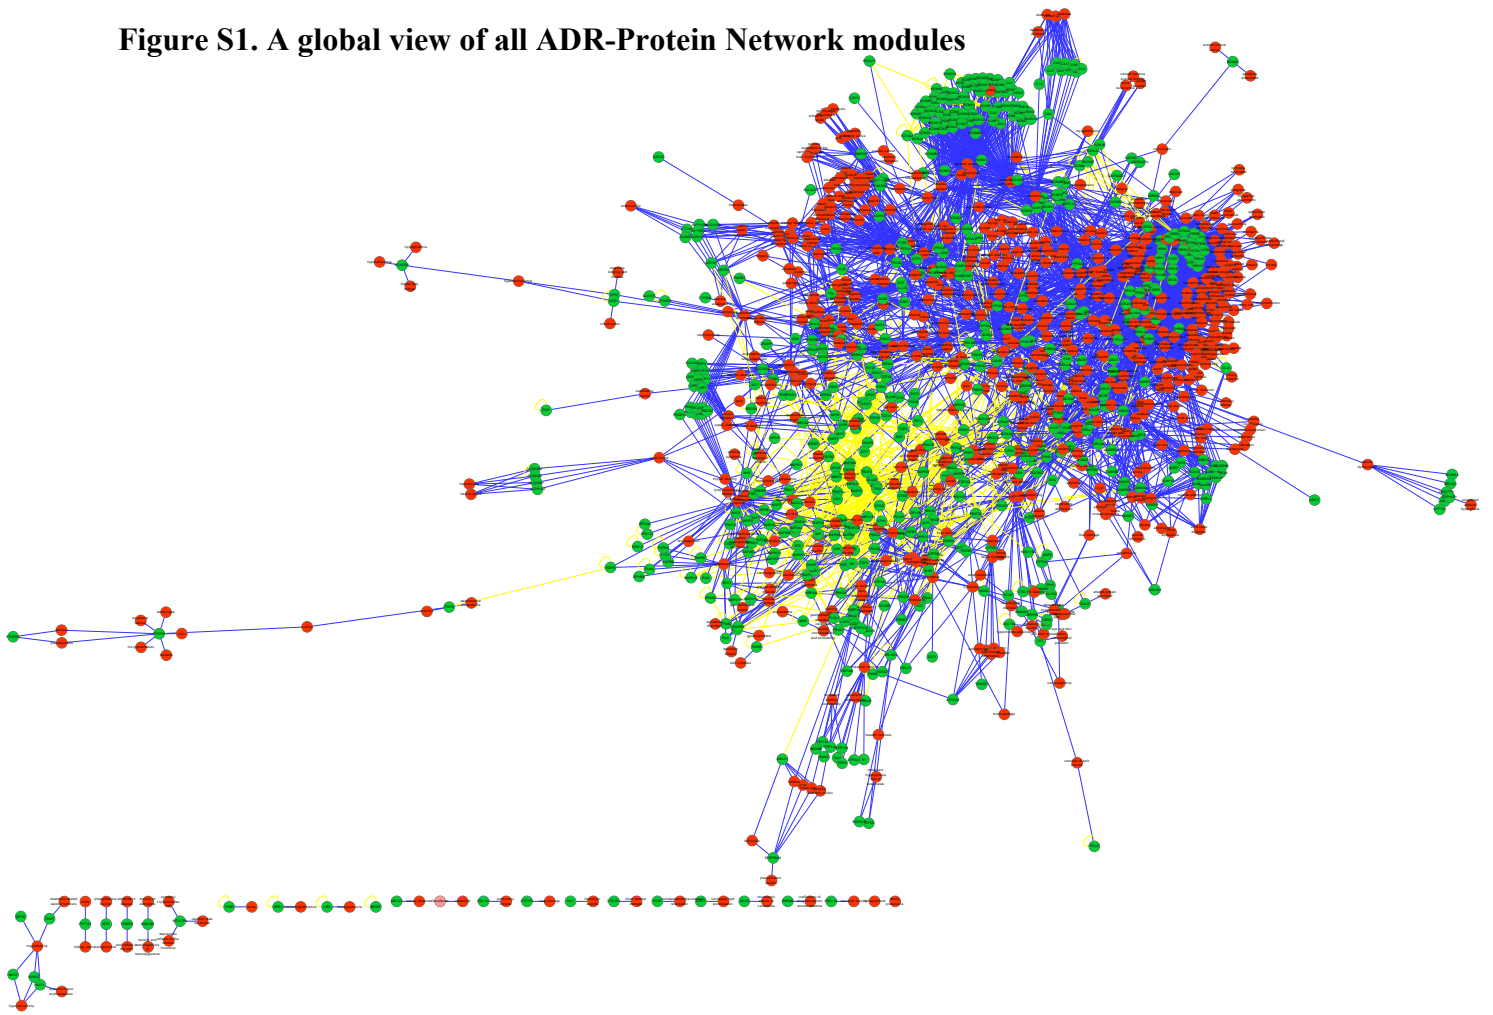

**Figure S2. Degree distribution of all the nodes in ADR- Protein network**

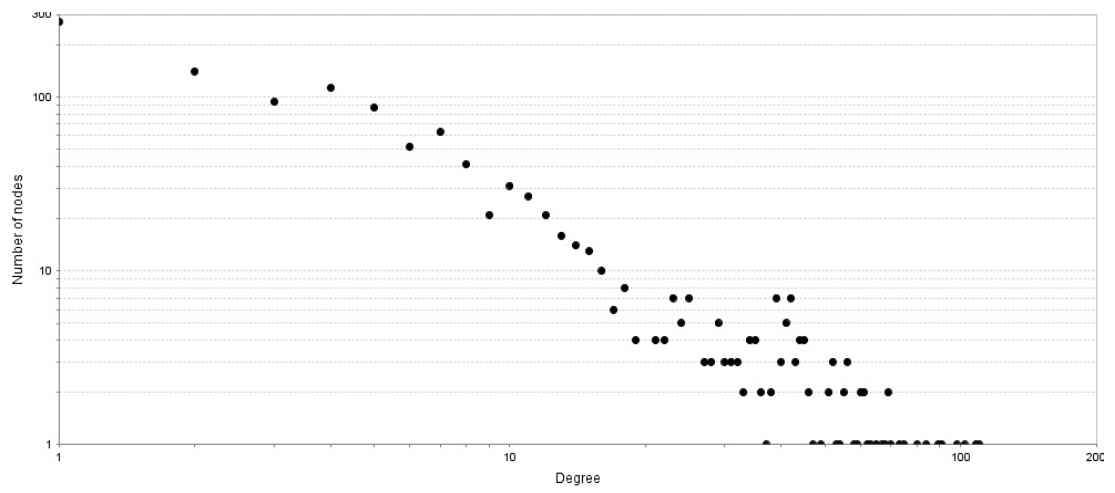

**Figure S3. Degree distribution of all ADRPs in ADR- Protein network**

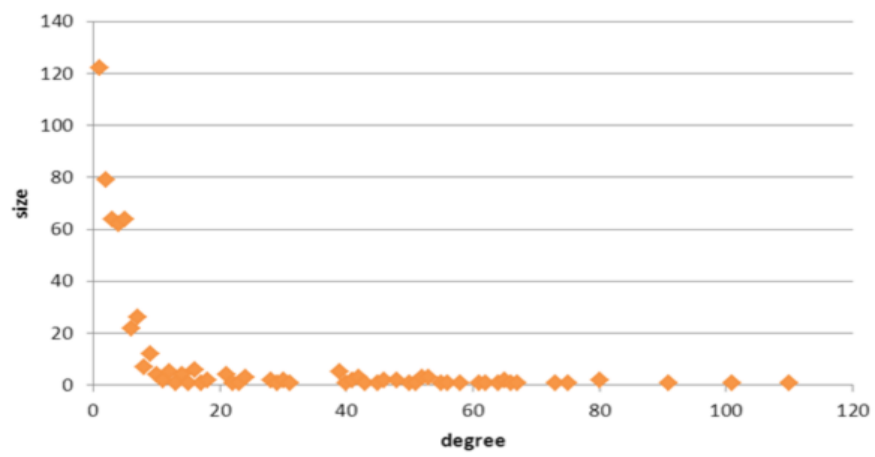

**Figure S4. Degree distribution of all ADRs in ADR- Protein network**

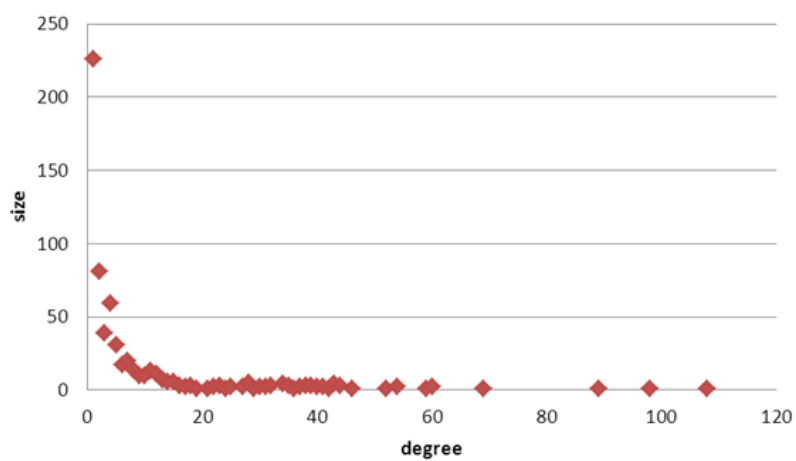

**Figure S5. Composition map of 41 modules**

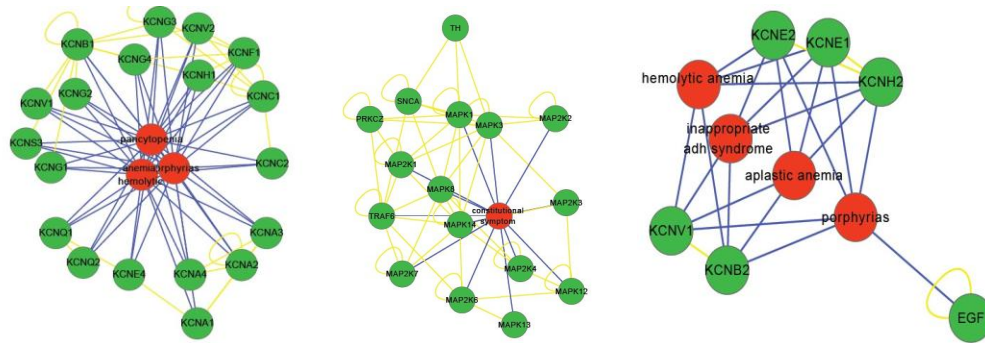

Module 1

Module 2

Module 3

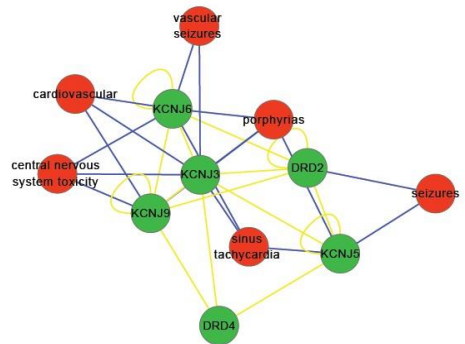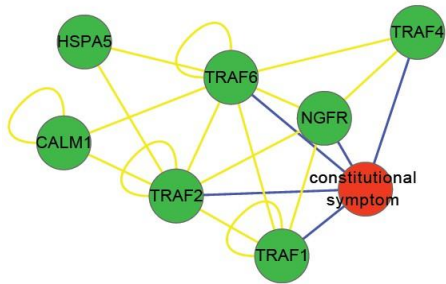

Module 4

Module 5

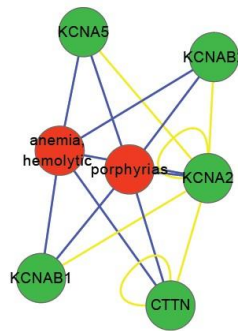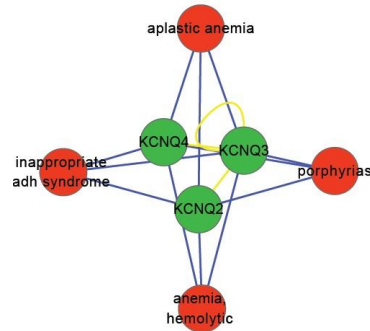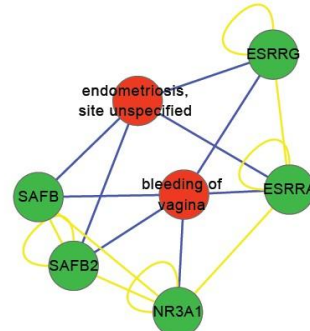

Module 6

Module 7

Module 8

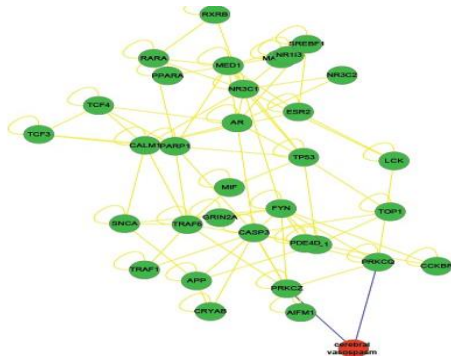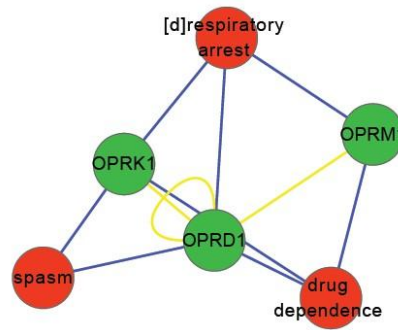

Module 9

Module 10

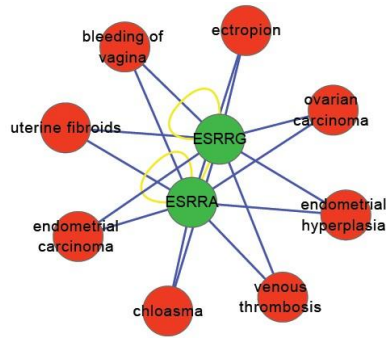

Module 11

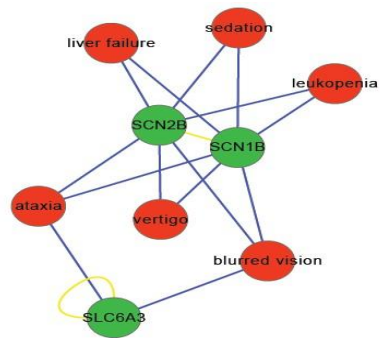

Module 12

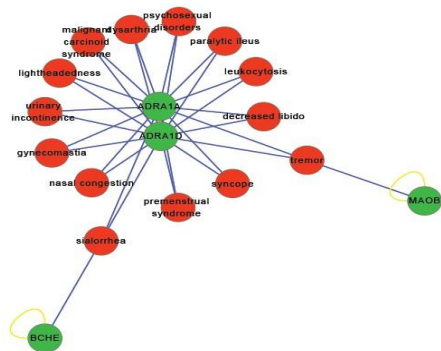

Module 13

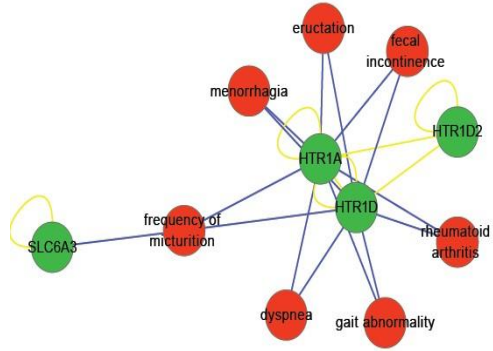

Module 14

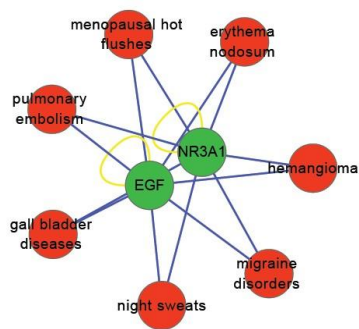

Module 15

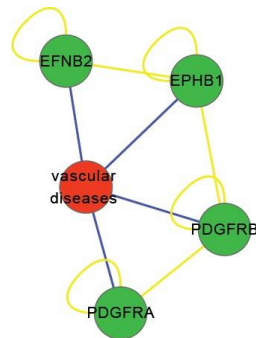

Module 16

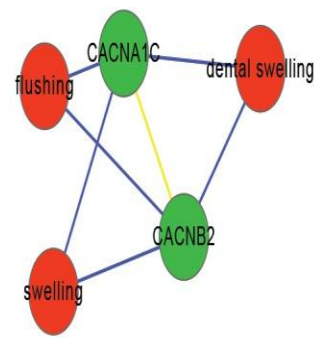

Module 17

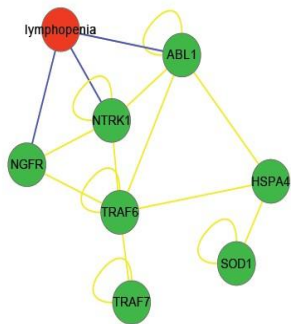

Module 18

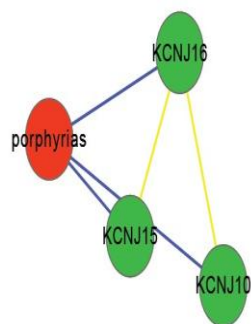

Module 19

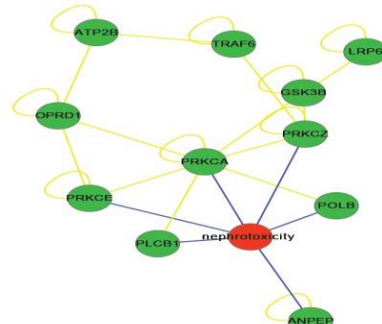

Module 20



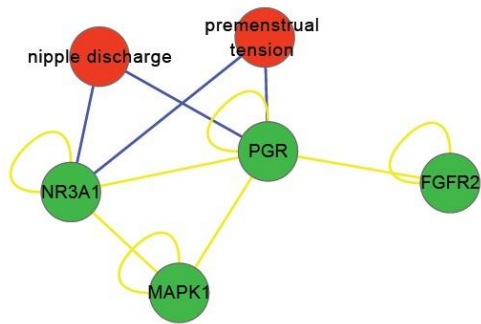

Module 21

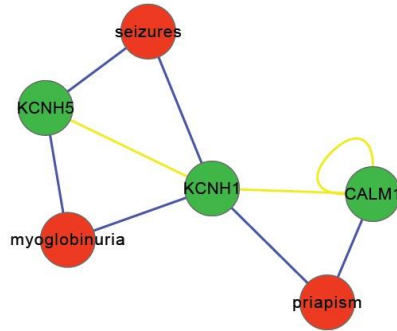

Module 22

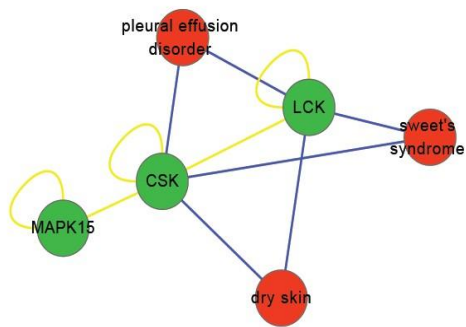

Module 23

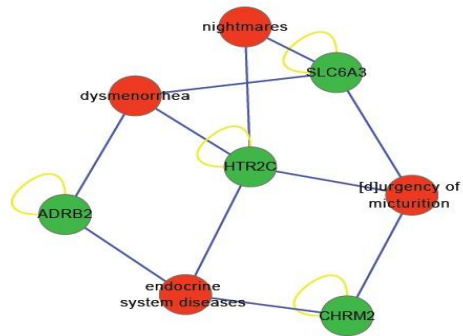

Module 24

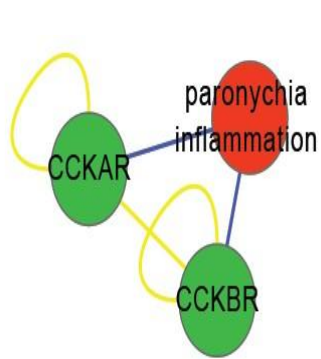

Module 25

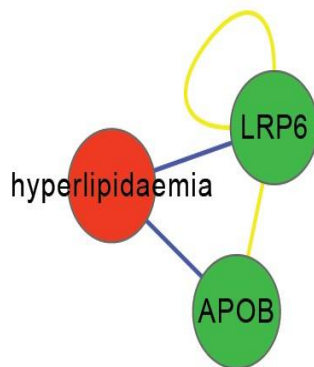

Module 26

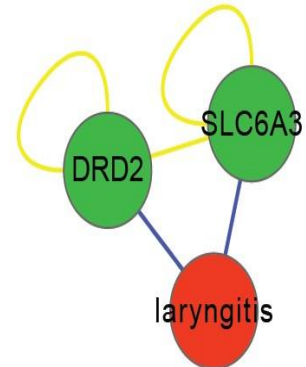

Module 27

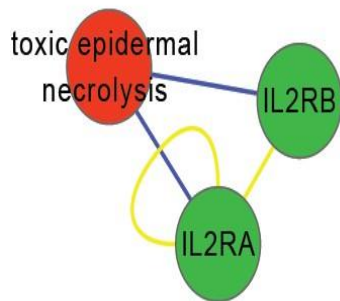

Module 28

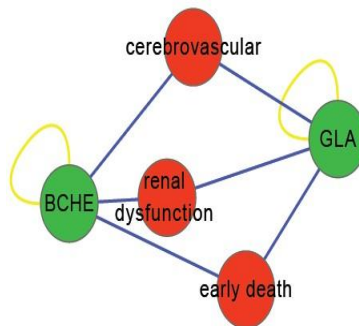

Module 29

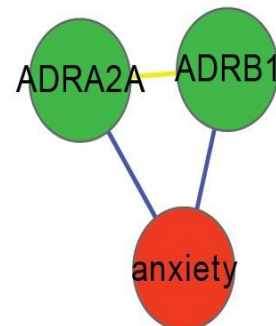

Module 30

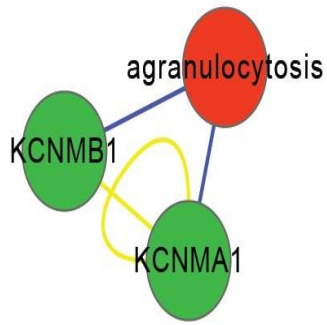

Module 31

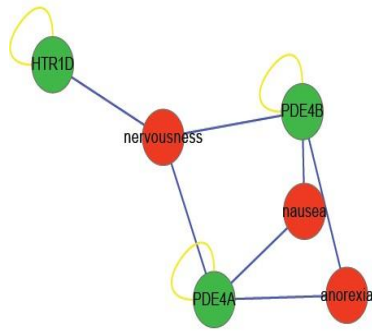

Module 32

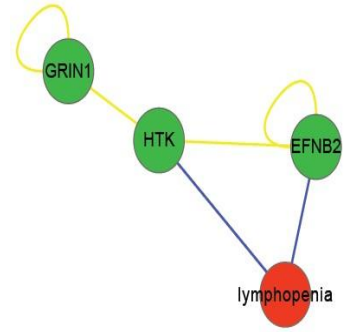

Module 33

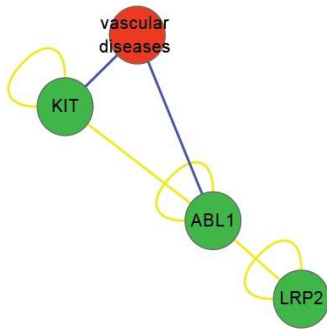

Module 34

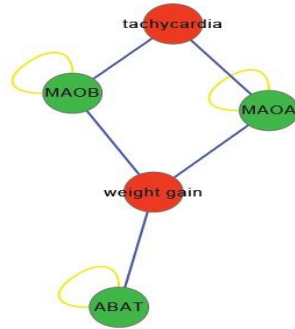

Module 35

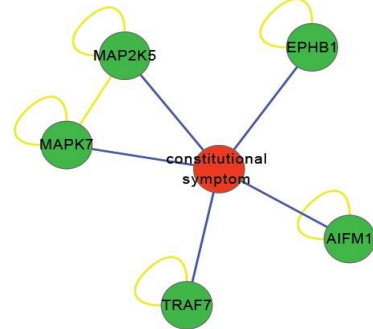

Module 36

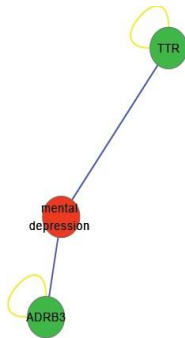

Module 37

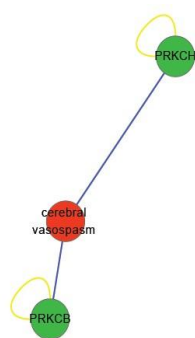

Module 38

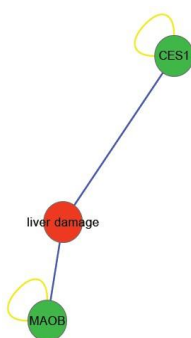

Module 39

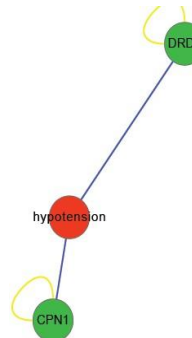

Module 40

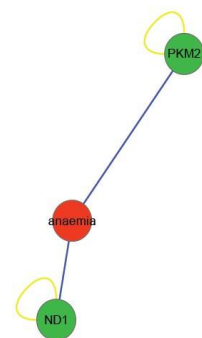

Module 41

**Figure S6. The result of nonparametric multiple comparison test for tissue distributions**

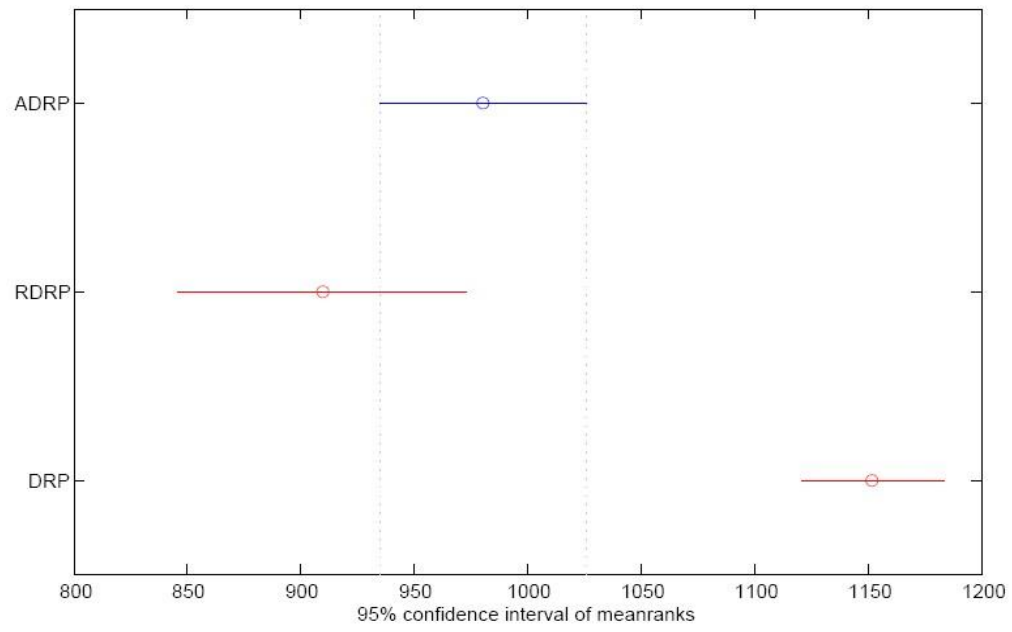

**Figure S7. Tissue distributions of ADRPs, RDRPs and DRPs by randomly select equal numbers (A: 50, B: 100, C: 200, D: 285)**

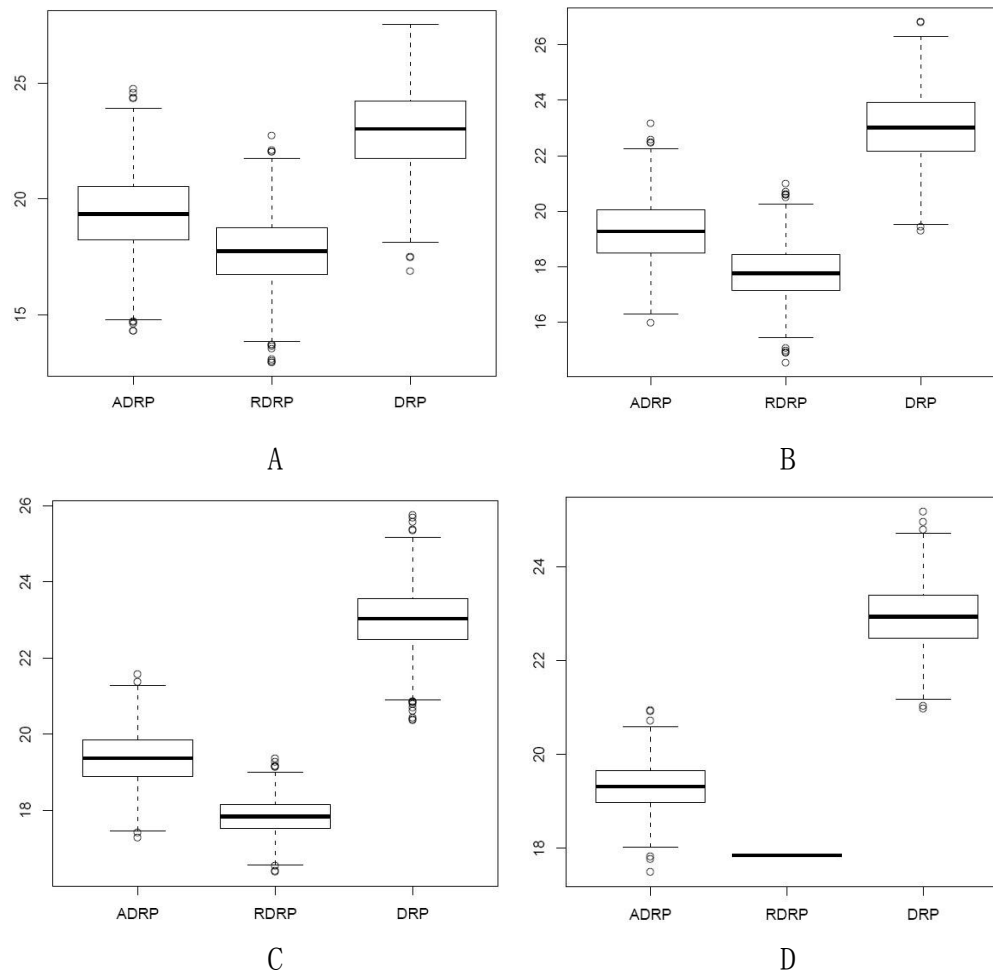

To address whether Figure 4 is biased due to inequality of sample size, we randomly selected equal numbers (A: 50, B: 100, C: 200, D: 285) of ADRPs, RDRPs and DRPs to calculate the mean of tissue distribution number. The procedure is repeated 1000 times to compare tissue specificity.

**Figure S8. The distribution of ADRPs and DRPs in each tissue**

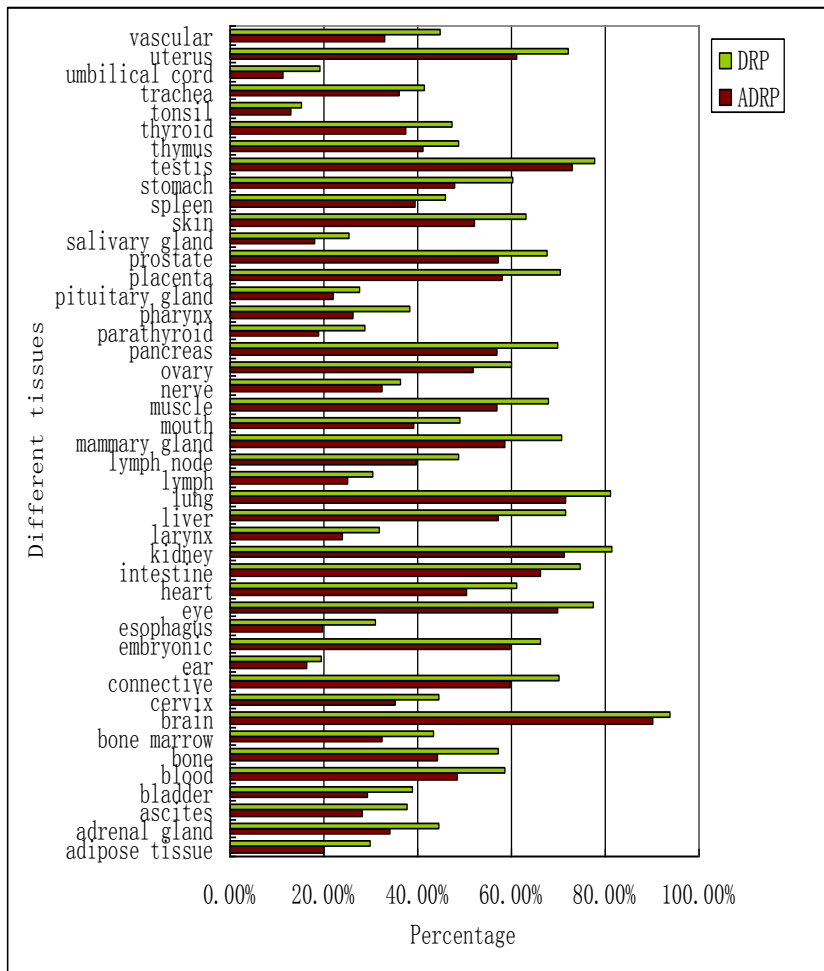

**Figure S9. The distribution of ADRPs and DRPs in different interval of tissue number**

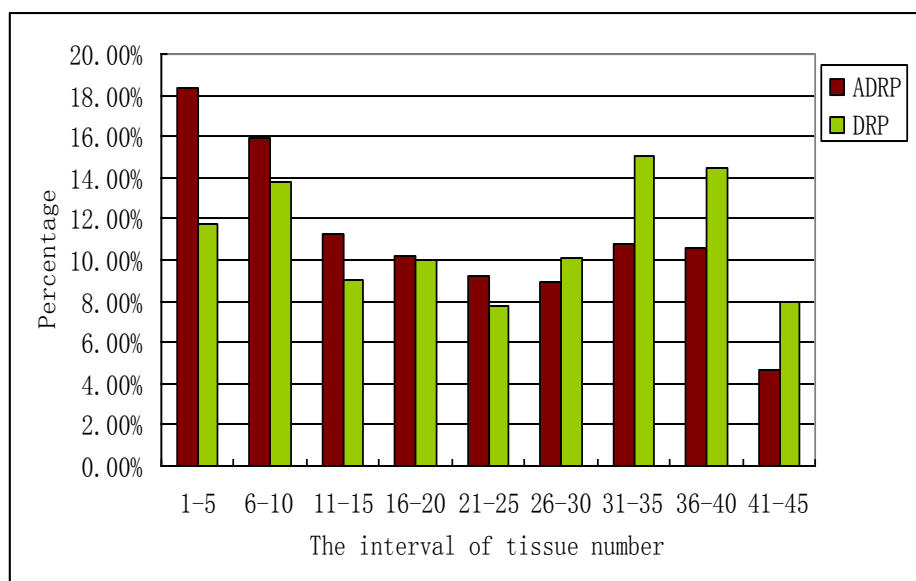

Supplement: srep01744-s1.pdf [file srep01744-s1.pdf]
